# Supplementary material for: Comparing Reproductive Health Awareness, Nutrition, and Hygiene among Early and Late Adolescents from Marginalized Populations of India: A Community-Based Cross-Sectional Survey
Source: MDPI journal article supplement (doi:10.3390/healthcare9080980), 2021-08-02
Supplement: s1 [file s1]

**Table S1: Unadjusted logistic regression between eight outcomes and socio-demographic factors among adolescent girls (n=19164)**

| Variables                                                  | Had anemia<br>(yes) <sup>1</sup><br>OR (95%CI) | Consumed<br>IFA tablets<br>(yes) <sup>1</sup><br>OR (95%CI) | Heard about<br>HIV/AIDS<br>(yes) <sup>1</sup><br>OR (95%CI) | Heard about<br>STI/RTI (yes) <sup>1</sup><br>OR (95%CI) | Open defecation<br>(yes) <sup>1</sup> OR (95%CI) | Washed hands after<br>defecation with<br>soaps/ashes<br>(yes) <sup>1</sup> OR (95%CI) | Had 3 or more<br>meals in a day<br>(yes) <sup>1</sup> OR<br>(95%CI) | Safe menstrual<br>hygiene practices<br>(yes) <sup>1</sup> OR (95%CI) |
|------------------------------------------------------------|------------------------------------------------|-------------------------------------------------------------|-------------------------------------------------------------|---------------------------------------------------------|--------------------------------------------------|---------------------------------------------------------------------------------------|---------------------------------------------------------------------|----------------------------------------------------------------------|
| <b>Religion</b>                                            |                                                |                                                             |                                                             |                                                         |                                                  |                                                                                       |                                                                     |                                                                      |
| Hindu                                                      | 1.1(1.0,1.3) <sup>‡</sup>                      | 1.2(1.1,1.3)*                                               | 1.1(1.0,1.2) <sup>§</sup>                                   | 1.2(1.1,1.3)*                                           | 2.5(2.2,2.8)*                                    | 0.5(0.4,0.6)*                                                                         | 1.3(1.2,1.4)*                                                       | 0.4(0.4,0.5)*                                                        |
| Non-Hindu <sup>®</sup>                                     | <i>Reference</i>                               | <i>Reference</i>                                            | <i>Reference</i>                                            | <i>Reference</i>                                        | <i>Reference</i>                                 | <i>Reference</i>                                                                      | <i>Reference</i>                                                    | <i>Reference</i>                                                     |
| <b>Caste</b>                                               |                                                |                                                             |                                                             |                                                         |                                                  |                                                                                       |                                                                     |                                                                      |
| Non-marginalized                                           | 0.8(0.7,0.9) <sup>‡</sup>                      | 2.0(1.8,2.2)*                                               | 1.4(1.3,1.6)*                                               | 0.6(0.5,0.7)*                                           | 0.07(0.06,0.09)*                                 | 3.8(3.1,4.5)*                                                                         | 1.1(1.0,1.3) <sup>‡</sup>                                           | 10.4(7.6,14.2)*                                                      |
| Other backward classes                                     | 0.6(0.6,0.7)*                                  | 0.9(0.9,1.0)                                                | 1.2(1.1,1.2)*                                               | 1.1(1.1,1.2)*                                           | 0.8(0.7,0.8)*                                    | 1.7(1.6,1.9)*                                                                         | 1.0(0.9,1.0)                                                        | 1.4(1.2,1.6)*                                                        |
| Scheduled caste/tribes                                     | <i>Reference</i>                               | <i>Reference</i>                                            | <i>Reference</i>                                            | <i>Reference</i>                                        | <i>Reference</i>                                 | <i>Reference</i>                                                                      | <i>Reference</i>                                                    | <i>Reference</i>                                                     |
| <b>Socio-economic status</b>                               |                                                |                                                             |                                                             |                                                         |                                                  |                                                                                       |                                                                     |                                                                      |
| No cards                                                   | 0.9(0.8,1.1)                                   | 1.0(0.9,1.1)                                                | 0.6(0.6,0.7)*                                               | 0.9(0.8,1.1)                                            | 0.6(0.6,0.7)*                                    | 0.6(0.5,0.7)*                                                                         | 1.0(0.9,1.2)                                                        | 1.6(1.2,2.0)*                                                        |
| Above Poverty Line                                         | 0.7(0.6,0.7)*                                  | 1.2(1.1,1.3)*                                               | 0.8(0.7,0.8)*                                               | 0.8(0.8,0.9) <sup>§</sup>                               | 0.5(0.4,0.5)*                                    | 1.1(1.0,1.2) <sup>§</sup>                                                             | 0.5(0.5,0.6)*                                                       | 0.8(0.7,0.9) <sup>§</sup>                                            |
| Antayodya Ann Yojna <sup>†</sup> and<br>Below Poverty Line | <i>Reference</i>                               | <i>Reference</i>                                            | <i>Reference</i>                                            | <i>Reference</i>                                        | <i>Reference</i>                                 | <i>Reference</i>                                                                      | <i>Reference</i>                                                    | <i>Reference</i>                                                     |
| <b>Education status</b>                                    |                                                |                                                             |                                                             |                                                         |                                                  |                                                                                       |                                                                     |                                                                      |
| Illiterate                                                 | 1.4(1.1,1.7) <sup>§</sup>                      | 0.4(0.3,0.5)*                                               | 0.2(0.1,0.2)*                                               | 0.4(0.3,0.5)*                                           | 2.5(2.1,3.0)*                                    | 0.1(0.1,0.2)*                                                                         | 1.5(1.2,2.0) <sup>§</sup>                                           | 0.2(0.1,0.3)*                                                        |
| Primary                                                    | 0.6(0.6,0.8)*                                  | 0.5(0.5,0.6)*                                               | 0.1(0.1,0.2)*                                               | 0.3(0.3,0.4)*                                           | 1.5(1.3,1.7)*                                    | 0.4(0.4,0.5)*                                                                         | 0.9(0.8,1.1)                                                        | 0.4(0.3,0.5)*                                                        |
| Upper primary                                              | 0.8(0.7,0.9) <sup>‡</sup>                      | 0.8(0.7,0.8)*                                               | 0.3(0.2,0.3)*                                               | 0.4(0.3,0.5)*                                           | 1.2(1.1,1.3)*                                    | 0.7(0.6,0.8)*                                                                         | 1.0(0.9,1.1)                                                        | 0.5(0.4,0.6)*                                                        |
| Secondary                                                  | 0.9(0.8,1.0)                                   | 1.0(0.9,1.1)                                                | 0.7(0.6,0.7)*                                               | 0.7(0.6,0.8)*                                           | 0.9(0.8,1.0)                                     | 0.8(0.7,0.9) <sup>§</sup>                                                             | 1.2(1.0,1.3) <sup>§</sup>                                           | 0.7(0.6,0.9) <sup>§</sup>                                            |
| Senior secondary & above                                   | <i>Reference</i>                               | <i>Reference</i>                                            | <i>Reference</i>                                            | <i>Reference</i>                                        | <i>Reference</i>                                 | <i>Reference</i>                                                                      | <i>Reference</i>                                                    | <i>Reference</i>                                                     |
| <b>Areas</b>                                               |                                                |                                                             |                                                             |                                                         |                                                  |                                                                                       |                                                                     |                                                                      |
| Rural                                                      | 0.9(0.8,1.0)                                   | 0.6(0.5,0.6)*                                               | 0.9(0.8,1.0)                                                | 1.7(1.6,1.9)*                                           | 2986.3(420.4,21210.7)*                           | 0.2(0.2,0.2)*                                                                         | 0.8(0.7,0.9)*                                                       | 0.05(0.04,0.06)*                                                     |
| Urban                                                      | <i>Reference</i>                               | <i>Reference</i>                                            | <i>Reference</i>                                            | <i>Reference</i>                                        | <i>Reference</i>                                 | <i>Reference</i>                                                                      | <i>Reference</i>                                                    | <i>Reference</i>                                                     |

\*p-value<0.001; §p-value<0.01; ‡p-value<0.05

®Non-Hindu includes Muslim, Buddhist, Jain, Sikhs, Christians, and Parsis; †Antayodya Ann Yojna includes extremely poor people.

<sup>1</sup>No was the reference category

Abbreviations: OR: Unadjusted Odds Ratio; CI: Confidence Interval; IFA: Iron Folic Acid tablets; RTI/STI: Reproductive Tract Infections/Sexually Transmitted Infections

**Table S2: Adjusted logistic regression between eight outcomes and socio-demographic factors among adolescent girls (n=19162)**

| Variables                                                  | Had anemia<br>(yes) <sup>1</sup><br>aOR (95%CI) | Consumed<br>IFA tablets<br>(yes) <sup>1</sup><br>aOR (95%CI) | Heard about<br>HIV/AIDS<br>(yes) <sup>1</sup><br>aOR (95%CI) | Heard about<br>STI/RTI (yes) <sup>1</sup><br>aOR (95%CI) | Open defecation<br>(yes) <sup>1</sup> aOR (95%CI) | Washed hands after<br>defecation with<br>soaps/ashes<br>(yes) <sup>1</sup> aOR (95%CI) | Had 3 or more<br>meals in a day<br>(yes) <sup>1</sup> aOR<br>(95%CI) | Safe menstrual<br>hygiene practices<br>(yes) <sup>1</sup> aOR<br>(95%CI) |
|------------------------------------------------------------|-------------------------------------------------|--------------------------------------------------------------|--------------------------------------------------------------|----------------------------------------------------------|---------------------------------------------------|----------------------------------------------------------------------------------------|----------------------------------------------------------------------|--------------------------------------------------------------------------|
| <b>Religion</b>                                            |                                                 |                                                              |                                                              |                                                          |                                                   |                                                                                        |                                                                      |                                                                          |
| Hindu                                                      | 1.1(0.9,1.2)                                    | 1.4(1.3,1.6)*                                                | 1.1(1.0,1.2)¶                                                | 1.0(0.9,1.1)                                             | 1.5(1.3,1.7)*                                     | 0.8(0.7,0.9)§                                                                          | 1.4(1.3,1.6)*                                                        | 0.9(0.7,1.1)                                                             |
| Non-Hindu <sup>§</sup>                                     | <i>Reference</i>                                | <i>Reference</i>                                             | <i>Reference</i>                                             | <i>Reference</i>                                         | <i>Reference</i>                                  | <i>Reference</i>                                                                       | <i>Reference</i>                                                     | <i>Reference</i>                                                         |
| <b>Caste</b>                                               |                                                 |                                                              |                                                              |                                                          |                                                   |                                                                                        |                                                                      |                                                                          |
| Non-marginalized                                           | 0.8(0.7,1.0)                                    | 1.6(1.5,1.8)*                                                | 1.5(1.4,1.7)*                                                | 0.8(0.7,0.9)§                                            | 0.3(0.2,0.3)*                                     | 1.9(1.6,2.3)*                                                                          | 1.1(1.0,1.3)¶                                                        | 2.9(2.1,4.1)*                                                            |
| Other backward classes                                     | 0.7(0.6,0.8)*                                   | 0.9(0.8,1.0)                                                 | 1.2(1.1,1.3)*                                                | 1.1(1.0,1.2)*                                            | 0.9(0.9,1.0)                                      | 1.6(1.4,1.7)*                                                                          | 1.1(1.0,1.2)§                                                        | 1.3(1.2,1.5)*                                                            |
| Scheduled caste/tribes                                     | <i>Reference</i>                                | <i>Reference</i>                                             | <i>Reference</i>                                             | <i>Reference</i>                                         | <i>Reference</i>                                  | <i>Reference</i>                                                                       | <i>Reference</i>                                                     | <i>Reference</i>                                                         |
| <b>Socio-economic status</b>                               |                                                 |                                                              |                                                              |                                                          |                                                   |                                                                                        |                                                                      |                                                                          |
| No cards                                                   | 1.0(0.8,1.1)                                    | 0.8(0.7,0.9)¶                                                | 0.6(0.5,0.7)*                                                | 1.1(1.0,1.3)¶                                            | 1.2(1.0,1.4)§                                     | 0.4(0.3,0.4)*                                                                          | 1.0(0.8,1.2)                                                         | 1.0(0.8,1.3)                                                             |
| Above Poverty Line                                         | 0.7(0.6,0.8)*                                   | 1.2(1.1,1.3)*                                                | 0.7(0.6,0.7)*                                                | 0.8(0.7,0.9)*                                            | 0.4(0.4,0.4)*                                     | 1.0(0.9,1.1)                                                                           | 0.5(0.5,0.6)*                                                        | 0.7(0.6,0.8)*                                                            |
| Antayodya Ann Yojna <sup>†</sup> and<br>Below Poverty Line | <i>Reference</i>                                | <i>Reference</i>                                             | <i>Reference</i>                                             | <i>Reference</i>                                         | <i>Reference</i>                                  | <i>Reference</i>                                                                       | <i>Reference</i>                                                     | <i>Reference</i>                                                         |
| <b>Education status</b>                                    |                                                 |                                                              |                                                              |                                                          |                                                   |                                                                                        |                                                                      |                                                                          |
| Illiterate                                                 | 1.5(1.2,1.8)§                                   | 0.5(0.4,0.6)*                                                | 0.2(0.2,0.3)*                                                | 0.4(0.3,0.6)*                                            | 2.0(1.6,2.4)*                                     | 0.2(0.1,0.2)*                                                                          | 1.6(1.2,2.0)*                                                        | 0.3(0.2,0.4)*                                                            |
| Primary                                                    | 1.0(0.9,1.2)                                    | 0.6(0.5,0.7)*                                                | 0.2(0.2,0.3)*                                                | 0.5(0.4,0.6)*                                            | 1.8(1.6,2.1)*                                     | 0.3(0.3,0.4)*                                                                          | 1.1(0.9,1.2)                                                         | 0.4(0.3,0.5)*                                                            |
| Upper primary                                              | 1.2(1.1,1.4)§                                   | 0.8(0.8,0.9)¶                                                | 0.4(0.4,0.5)*                                                | 0.6(0.5,0.7)*                                            | 1.5(1.4,1.7)*                                     | 0.5(0.4,0.6)*                                                                          | 1.1(0.9,1.1)                                                         | 0.4(0.3,0.5)*                                                            |
| Secondary                                                  | 1.0(0.9,1.2)                                    | 1.0(0.9,1.1)                                                 | 0.8(0.7,0.9)*                                                | 0.8(0.7,0.9)§                                            | 1.2(1.1,1.3)*                                     | 0.7(0.6,0.8)*                                                                          | 1.2(1.0,1.3)§                                                        | 0.5(0.4,0.6)*                                                            |
| Senior secondary & above                                   | <i>Reference</i>                                | <i>Reference</i>                                             | <i>Reference</i>                                             | <i>Reference</i>                                         | <i>Reference</i>                                  | <i>Reference</i>                                                                       | <i>Reference</i>                                                     | <i>Reference</i>                                                         |
| <b>Age</b>                                                 |                                                 |                                                              |                                                              |                                                          |                                                   |                                                                                        |                                                                      |                                                                          |
| Early adolescence (10-14)                                  | 0.4(0.4,0.5)*                                   | 0.8(0.7,0.9)*                                                | 0.5(0.4,0.5)*                                                | 0.5(0.4,0.5)*                                            | 0.9(0.8-0.9)¶                                     | 1.5(1.3,1.6)*                                                                          | 0.8(0.7-0.9)§                                                        | 1.4(1.2,1.6)*                                                            |
| Late adolescence (15-19)                                   | <i>Reference</i>                                | <i>Reference</i>                                             | <i>Reference</i>                                             | <i>Reference</i>                                         | <i>Reference</i>                                  | <i>Reference</i>                                                                       | <i>Reference</i>                                                     | <i>Reference</i>                                                         |
| <b>Areas</b>                                               |                                                 |                                                              |                                                              |                                                          |                                                   |                                                                                        |                                                                      |                                                                          |
| Rural                                                      | 0.8(0.7,0.9)§                                   | 0.6(0.5,0.6)*                                                | 0.9(0.8,1.0)                                                 | 1.5(1.4,1.7)*                                            | 2437.3(342.9,17322.5)*                            | 0.2(0.2,0.3)*                                                                          | 0.8(0.7,0.9)*                                                        | 0.07(0.05,0.09)*                                                         |
| Urban                                                      | <i>Reference</i>                                | <i>Reference</i>                                             | <i>Reference</i>                                             | <i>Reference</i>                                         | <i>Reference</i>                                  | <i>Reference</i>                                                                       | <i>Reference</i>                                                     | <i>Reference</i>                                                         |

\*p-value<0.001; §p-value<0.01; ¶p-value<0.05

§Non-Hindu includes Muslim, Buddhist, Jain, Sikhs, Christians, and Parsis; <sup>†</sup>Antayodya Ann Yojna includes extremely poor people.

<sup>1</sup>No was the reference category

Abbreviations: aOR: Adjusted Odds Ratio; CI: Confidence Interval; IFA: Iron Folic Acid tablets; RTI/STI: Reproductive Tract Infections/Sexually Transmitted Infections

**Table S3: Unadjusted logistic regression between seven outcomes and socio-demographic factors among adolescent boys (n=19009)**

| Variables                                                      | Had anemia (yes) <sup>1</sup><br>OR (95%CI) | Consumed IFA tablets (yes) <sup>1</sup><br>OR (95%CI) | Heard about HIV/AIDS (yes) <sup>1</sup><br>OR (95%CI) | Heard about STI/RTI (yes) <sup>1</sup><br>OR (95%CI) | Open defecation (yes) <sup>1</sup> OR (95%CI) | Washed hands after defecation with soaps/ashes (yes) <sup>1</sup> OR (95%CI) | Had 3 or more meals in a day (yes) <sup>1</sup> OR (95%CI) |
|----------------------------------------------------------------|---------------------------------------------|-------------------------------------------------------|-------------------------------------------------------|------------------------------------------------------|-----------------------------------------------|------------------------------------------------------------------------------|------------------------------------------------------------|
| <b>Religion</b>                                                |                                             |                                                       |                                                       |                                                      |                                               |                                                                              |                                                            |
| Hindu                                                          | 0.9(0.8,1.0)                                | 0.4(0.4,0.5)*                                         | 1.2(1.1,1.3)*                                         | 1.8(1.6,2.0)*                                        | 4.8(4.1,5.5)*                                 | 0.5(0.4,0.5)*                                                                | 1.3(1.2,1.4)*                                              |
| Non-Hindu <sup>‡</sup>                                         | <i>Reference</i>                            | <i>Reference</i>                                      | <i>Reference</i>                                      | <i>Reference</i>                                     | <i>Reference</i>                              | <i>Reference</i>                                                             | <i>Reference</i>                                           |
| <b>Caste</b>                                                   |                                             |                                                       |                                                       |                                                      |                                               |                                                                              |                                                            |
| Non-marginalized                                               | 1.6(1.4,1.9)*                               | 2.6(2.4,2.9)*                                         | 1.4(1.2,1.5)*                                         | 0.5(0.5,0.6)*                                        | 0.1(0.1,0.1)*                                 | 2.2(1.9,2.6)*                                                                | 1.2(1.0,1.3) <sup>§</sup>                                  |
| Other backward classes                                         | 0.6(0.5,0.7)*                               | 0.5(0.5,0.6)*                                         | 1.1(1.0,1.1) <sup>§</sup>                             | 1.0(0.9,1.1)                                         | 1.0(0.9,1.1)                                  | 1.3(1.2,1.5)*                                                                | 1.1(1.0,1.2)*                                              |
| Scheduled caste/tribes                                         | <i>Reference</i>                            | <i>Reference</i>                                      | <i>Reference</i>                                      | <i>Reference</i>                                     | <i>Reference</i>                              | <i>Reference</i>                                                             | <i>Reference</i>                                           |
| <b>Socio-economic status</b>                                   |                                             |                                                       |                                                       |                                                      |                                               |                                                                              |                                                            |
| No cards                                                       | 1.1(0.9,1.4)                                | 1.3(1.2,1.5)*                                         | 0.6(0.5,0.6)*                                         | 0.8(0.7,1.0)                                         | 0.8(0.7,0.9)*                                 | 0.6(0.5,0.7)*                                                                | 1.0(0.8,1.1)                                               |
| Above Poverty Line                                             | 0.7(0.6,0.8)*                               | 1.3(1.2,1.4)*                                         | 0.7(0.7,0.8)*                                         | 0.6(0.6,0.7)*                                        | 0.4(0.3,0.4)*                                 | 1.2(1.1,1.4)*                                                                | 0.5(0.5,0.6)*                                              |
| <i>Antayodya Ann Yojna</i> <sup>†</sup> and Below Poverty Line | <i>Reference</i>                            | <i>Reference</i>                                      | <i>Reference</i>                                      | <i>Reference</i>                                     | <i>Reference</i>                              | <i>Reference</i>                                                             | <i>Reference</i>                                           |
| <b>Education status</b>                                        |                                             |                                                       |                                                       |                                                      |                                               |                                                                              |                                                            |
| Illiterate                                                     | 2.0(1.2,3.3) <sup>§</sup>                   | 0.9(0.6,1.3)                                          | 0.2(0.2,0.3)*                                         | 0.3(0.2,0.4)*                                        | 2.0(1.5,2.8)*                                 | 0.3(0.2,0.5)*                                                                | 0.8(0.6,1.1)                                               |
| Primary                                                        | 1.5(1.1,2.1) <sup>§</sup>                   | 2.4(2.0,2.8)*                                         | 0.2(0.1,0.2)*                                         | 0.3(0.2,0.3)*                                        | 1.8(1.5,2.2)*                                 | 0.4(0.3,0.5)*                                                                | 1.1(1.0,1.3) <sup>¶</sup>                                  |
| Upper primary                                                  | 1.8(1.3,2.4)*                               | 2.7(2.3,3.3)*                                         | 0.5(0.4,0.6)*                                         | 0.4(0.3,0.5)*                                        | 1.4(1.2,1.7)*                                 | 0.6(0.4,0.7)*                                                                | 1.3(1.1,1.6)*                                              |
| Secondary                                                      | 1.5(1.1,2.2) <sup>§</sup>                   | 2.1(1.8,2.5)*                                         | 0.8(0.7,1.0)                                          | 0.6(0.5,0.7)*                                        | 1.1(0.9,1.4)                                  | 0.7(0.5,1.0)                                                                 | 1.0(0.8,1.2)                                               |
| Senior secondary & above                                       | <i>Reference</i>                            | <i>Reference</i>                                      | <i>Reference</i>                                      | <i>Reference</i>                                     | <i>Reference</i>                              | <i>Reference</i>                                                             | <i>Reference</i>                                           |
| <b>Areas</b>                                                   |                                             |                                                       |                                                       |                                                      |                                               |                                                                              |                                                            |
| Rural                                                          | 0.3(0.3,0.4)*                               | 0.07(0.06,0.08)*                                      | 0.8(0.7,0.8)*                                         | 1.7(1.6,1.9)*                                        | 853.2(213.2,3414.4)*                          | 0.4(0.3,0.4)*                                                                | 0.6(0.5,0.6)*                                              |
| Urban                                                          | <i>Reference</i>                            | <i>Reference</i>                                      | <i>Reference</i>                                      | <i>Reference</i>                                     | <i>Reference</i>                              | <i>Reference</i>                                                             | <i>Reference</i>                                           |

\*p-value<0.001; §p-value<0.01; ¶p-value<0.05

<sup>‡</sup>Non-Hindu includes Muslim, Buddhist, Jain, Sikhs, Christians, and Parsis; <sup>†</sup>*Antayodya Ann Yojna* includes extremely poor people.

<sup>1</sup>No was the reference category

*Abbreviations:* OR: Unadjusted Odds Ratio; CI: Confidence Interval; IFA: Iron Folic Acid tablets; RTI/STI: Reproductive Tract Infections/Sexually Transmitted Infections

**Table S4: Adjusted logistic regression between seven outcomes and socio-demographic factors among adolescent boys (n=19008)**

| Variables                                               | Had anemia (yes) <sup>1</sup><br>aOR (95%CI) | Consumed IFA tablets (yes) <sup>1</sup><br>aOR (95%CI) | Heard about HIV/AIDS (yes) <sup>1</sup><br>aOR (95%CI) | Heard about STI/RTI (yes) <sup>1</sup><br>aOR (95%CI) | Open defecation (yes) <sup>1</sup> aOR (95%CI) | Washed hands after defecation with soaps/ashes (yes) <sup>1</sup> aOR (95%CI) | Had 3 or more meals in a day (yes) <sup>1</sup> aOR (95%CI) |
|---------------------------------------------------------|----------------------------------------------|--------------------------------------------------------|--------------------------------------------------------|-------------------------------------------------------|------------------------------------------------|-------------------------------------------------------------------------------|-------------------------------------------------------------|
| <b>Religion</b>                                         |                                              |                                                        |                                                        |                                                       |                                                |                                                                               |                                                             |
| Hindu                                                   | 1.1(0.9,1.3)                                 | 0.7(0.6,0.8)*                                          | 1.2(1.1,1.3)*                                          | 1.5(1.3,1.7)*                                         | 3.5(3.0,4.1)*                                  | 0.6(0.5,0.7)*                                                                 | 1.5(1.3,1.6)*                                               |
| Non-Hindu <sup>§</sup>                                  | <i>Reference</i>                             | <i>Reference</i>                                       | <i>Reference</i>                                       | <i>Reference</i>                                      | <i>Reference</i>                               | <i>Reference</i>                                                              | <i>Reference</i>                                            |
| <b>Caste</b>                                            |                                              |                                                        |                                                        |                                                       |                                                |                                                                               |                                                             |
| Non-marginalized                                        | 1.2(1.0,1.4) <sup>¶</sup>                    | 0.9(0.8,1.0)                                           | 1.2(1.1,1.3)*                                          | 0.6(0.5,0.8)*                                         | 0.3(0.3,0.4)*                                  | 1.4(1.2,1.7)*                                                                 | 1.0(0.9,1.2)                                                |
| Other backward classes                                  | 0.7(0.6,0.8)*                                | 0.5(0.4,0.5)*                                          | 1.0(1.0,1.1) <sup>¶</sup>                              | 1.0(0.9,1.1)                                          | 1.3(1.2,1.4)*                                  | 1.2(1.1,1.3)*                                                                 | 1.3(1.2,1.4)*                                               |
| Scheduled caste/tribes                                  | <i>Reference</i>                             | <i>Reference</i>                                       | <i>Reference</i>                                       | <i>Reference</i>                                      | <i>Reference</i>                               | <i>Reference</i>                                                              | <i>Reference</i>                                            |
| <b>Socio-economic status</b>                            |                                              |                                                        |                                                        |                                                       |                                                |                                                                               |                                                             |
| No cards                                                | 0.9(0.7,1.1)                                 | 0.6(0.5,0.7)*                                          | 0.6(0.5,0.7)*                                          | 1.1(0.9,1.3)                                          | 1.3(1.1,1.5) <sup>§</sup>                      | 0.5(0.4,0.6)*                                                                 | 0.9(0.7,1.0)                                                |
| Above Poverty Line                                      | 0.8(0.7,0.9) <sup>§</sup>                    | 2.0(1.9,2.2)*                                          | 0.7(0.6,0.7)*                                          | 0.6(0.5,0.6)*                                         | 0.3(0.3,0.3)*                                  | 1.2(1.1,1.3)*                                                                 | 0.5(0.5,0.6)*                                               |
| Antayodya Ann Yojna <sup>†</sup> and Below Poverty Line | <i>Reference</i>                             | <i>Reference</i>                                       | <i>Reference</i>                                       | <i>Reference</i>                                      | <i>Reference</i>                               | <i>Reference</i>                                                              | <i>Reference</i>                                            |
| <b>Education status</b>                                 |                                              |                                                        |                                                        |                                                       |                                                |                                                                               |                                                             |
| Illiterate                                              | 1.6(1.0,2.7) <sup>¶</sup>                    | 0.4(0.3,0.6)*                                          | 0.3(0.2,0.4)*                                          | 0.3(0.2,0.5)*                                         | 2.5(1.7,3.5)*                                  | 0.3(0.2,0.4)*                                                                 | 0.7(0.5,1.0)                                                |
| Primary                                                 | 1.3(0.9,1.8)                                 | 1.0(0.8,1.2)                                           | 0.3(0.2,0.3)*                                          | 0.4(0.3,0.5)*                                         | 2.7(2.2,3.2)*                                  | 0.3(0.2,0.4)*                                                                 | 1.1(0.9,1.3)                                                |
| Upper primary                                           | 1.4(1.0,1.9) <sup>¶</sup>                    | 1.5(1.2,1.8)*                                          | 0.5(0.5,0.6)*                                          | 0.5(0.4,0.6)*                                         | 1.9(1.5,2.3)*                                  | 0.5(0.4,0.6)*                                                                 | 1.3(1.0,1.5) <sup>§</sup>                                   |
| Secondary                                               | 1.3(0.9,1.8)                                 | 1.6(1.3,1.9)*                                          | 0.8(0.7,1.0)                                           | 0.6(0.5,0.8)*                                         | 1.3(1.1,1.7) <sup>§</sup>                      | 0.7(0.5,0.9) <sup>¶</sup>                                                     | 1.0(0.8,1.2)                                                |
| Senior secondary & above                                | <i>Reference</i>                             | <i>Reference</i>                                       | <i>Reference</i>                                       | <i>Reference</i>                                      | <i>Reference</i>                               | <i>Reference</i>                                                              | <i>Reference</i>                                            |
| <b>Age</b>                                              |                                              |                                                        |                                                        |                                                       |                                                |                                                                               |                                                             |
| Early adolescence (10-14)                               | 0.8(0.7,0.9) <sup>¶</sup>                    | 1.6(1.5,1.7)*                                          | 0.5(0.4,0.5)*                                          | 0.6(0.5,0.6)*                                         | 0.9(0.8,1.0)                                   | 1.3(1.2,1.5)*                                                                 | 1.0(0.9,1.1)                                                |
| Late adolescence (15-19)                                | <i>Reference</i>                             | <i>Reference</i>                                       | <i>Reference</i>                                       | <i>Reference</i>                                      | <i>Reference</i>                               | <i>Reference</i>                                                              | <i>Reference</i>                                            |
| <b>Areas</b>                                            |                                              |                                                        |                                                        |                                                       |                                                |                                                                               |                                                             |
| Rural                                                   | 0.4(0.3,0.5)*                                | 0.06(0.06,0.07)*                                       | 0.6(0.6,0.7)*                                          | 1.4(1.2,1.6)*                                         | 761.6(190.1,3051.1)*                           | 0.4(0.3,0.4)*                                                                 | 0.6(0.5,0.6)*                                               |
| Urban                                                   | <i>Reference</i>                             | <i>Reference</i>                                       | <i>Reference</i>                                       | <i>Reference</i>                                      | <i>Reference</i>                               | <i>Reference</i>                                                              | <i>Reference</i>                                            |

\*p-value<0.001; §p-value<0.01; ¶p-value<0.05

<sup>§</sup>Non-Hindu includes Muslim, Buddhist, Jain, Sikhs, Christians, and Parsis; <sup>†</sup>Antayodya Ann Yojna includes extremely poor people.

<sup>1</sup>No was the reference category

*Abbreviations:* aOR: Adjusted Odds Ratio; CI: Confidence Interval; IFA: Iron Folic Acid tablets; RTI/STI: Reproductive Tract Infections/Sexually Transmitted Infections;
